# Supplementary material for: Absence of the Adaptor Protein PEA-15 Is Associated with Altered Pattern of Th Cytokines Production by Activated CD4+ T Lymphocytes In Vitro, and Defective Red Blood Cell Alloimmune Response In Vivo
Source: PubMed Central journal article supplement (PMC4552951; doi:10.1371/journal.pone.0136885), 2015-08-28
Supplement: pone.0136885.s001.pdf [file pone.0136885.s001.pdf]

**S1 Table .** Sequences of oligonucleotide primers used for quantitative RT-PCR studies:

| <b>Gene name</b> | <b>GenBank Accession N°</b> |           | <b>Sequence 5'-3'</b>            | <b>Product Size (bp)</b> |
|------------------|-----------------------------|-----------|----------------------------------|--------------------------|
| <b>SF3A1</b>     | NM_026175                   | Forward : | CCACTGAGTCCAAACAGCCAAT           | 161                      |
|                  |                             | Reverse : | AGCTTCAAATTCAGGCCCAT             |                          |
| <b>c-Fos</b>     | NM_010234                   | Forward : | CAGAGCGGGAATGGTGAAGA             | 194                      |
|                  |                             | Reverse : | GTTGATCTGTCTCCGCTTGGA            |                          |
| <b>EGR1</b>      | NM_007913                   | Forward : | CAATCTGTACCCCGAGGAGATC           | 63                       |
|                  |                             | Reverse : | TCAGAGCGATGTCAGAAAAGGA           |                          |
| <b>EGR2</b>      | NM_010118                   | Forward : | CTCGCCGCCTCGTCGGT                | 174                      |
|                  |                             | Reverse : | CTGGTTTCTAGGTGCAGAGATGGGA        |                          |
| <b>EGR3</b>      | NM_018781                   | Forward : | ACTCGGTAGCCCATTACAATCAG          | 180                      |
|                  |                             | Reverse : | TGTCCTGGCACCAGTTGGA              |                          |
| <b>Foxp3</b>     | NM_054039                   | Forward : | TCCACAACATGCGACCCCTTTCA          | 217                      |
|                  |                             | Reverse : | ACAGCCCCCTTCTCGCTCTCCA           |                          |
| <b>GATA3</b>     | NM_008091                   | Forward : | GCCCCTCATTAAGCCCAAGCGA           | 169                      |
|                  |                             | Reverse : | CAGGGGTCTGTTAATATTGTGAAGCTTGTAGT |                          |
| <b>IL4I1</b>     | NM_010215                   | Forward : | GCTGGGCTACAACCTGAACAAC           | 202                      |
|                  |                             | Reverse : | CACATCTCCCAGGAGCTGCA             |                          |
| <b>RORC</b>      | NM_011281                   | Forward : | TCTGCAAGTCCTTCCGAGAGA            | 175                      |
|                  |                             | Reverse : | GCAAACCTCCACCACATACTGAATG        |                          |
| <b>T-bet</b>     | NM_019507                   | Forward : | ATCGTGGAGGTGAATGATGGAGAGC        | 288                      |
|                  |                             | Reverse : | GCTGGGAACAGGATACTGGTTGGATAGA     |                          |
